# Supplementary material for: Two-Year Outcomes of Asymptomatic vs. Symptomatic Patients After Deferral of Revascularization Based on Fractional Flow Reserve ― Insights From the J-CONFIRM Registry ―
Source: PubMed Central journal article supplement — Circ Rep. 2020 Nov 18;2(12):744–52. doi: 10.1253/circrep.CR-20-0110 (PMC7937522; doi:10.1253/circrep.cr-20-0110), 2020-11-18
Supplement: circrep-2-744-s001.pdf [file circrep-2-744-s001.pdf]

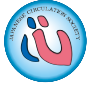

---

## **Two-Year Outcomes of Asymptomatic vs. Symptomatic Patients After Deferral of Revascularization Based on Fractional Flow Reserve**

— Insights From the J-CONFIRM Registry —

---

Kazunori Horie, MD; Shoichi Kuramitsu, MD, PhD; Hitoshi Matsuo, MD, PhD;  
Tomohiro Shinozaki, PhD; Hiroaki Takashima, MD, PhD; Yasutsugu Shiono, MD, PhD;  
Hidenobu Terai, MD; Yuetsu Kikuta, MD; Takayuki Ishihara, MD; Tatsuya Saigusa, MD;  
Tomohiro Sakamoto, MD, PhD; Taku Asano, MD, PhD; Kenichi Tsujita, MD, PhD;  
Katsuhiko Masamura, MD, PhD; Tatsuki Doijiri, MD; Manabu Ogita, MD, PhD;  
Tairo Kurita, MD, PhD; Akiko Matsuo, MD; Shinjo Sonoda, MD, PhD; Hiroyoshi Yokoi, MD;  
Nobuhiro Tanaka, MD, PhD on behalf of the J-CONFIRM Investigators

## Supplementary Material

### Supplementary Appendix. List of Participating Centers and the Investigators

Aichi Medical University: Hiroaki Takashima

Chidoribashi Hospital: Fumitoshi Toyota, Yohei Sasaki

Chubu Rosai Hospital: Ken Harada

Fukuoka Sanno Hospital: Hiroyoshi Yokoi, Yasunori Yamamoto

Fukuyama Cardiovascular Hospital: Yuetsu Kikuta, Mika Hirabayashi

Gifu Heart Center: Hitoshi Matsuo, Jun Kikuchi

Japanese Red Cross Kyoto Daini Hospital: Hiroshi Fujita, Akiko Matsuo

Juntendo University Shizuoka Hospital: Satoru Suwa, Manabu Ogita

Juntendo University Urayasu Hospital: Ken Yokoyama, Hiroyuki Isogai

Kainan Hospital: Takashi Yamada, Noriyoshi Kanemura

Kanazawa Cardiovascular Hospital: Hidenobu Terai

Kansai Rosai Hospital Cardiovascular Center: Osamu Iida, Takayuki Ishihara

Kumamoto University: Kenichi Tsujita, Kenshi Yamanaga

Kokura Memorial Hospital: Shoichi Kuramitsu

Mie University Graduate School of Medicine: Tairo Kurita

Nakamura Hospital: Katsuhiko Masamura, Masanori Kanehachi

Narita Memorial Hospital: Toru Niwa

Nayoro City General Hospital: Masaru Yamaki

Saiseikai Fukuoka General Hospital: Nobuhiro Suematsu, Takeshi Serikawa, Masahiro Natsuaki

Saiseikai Kumamoto Hospital Cardiovascular Center: Tomohiro Sakamoto, Kazuhisa Kodama

Sendai Kosei Hospital: Kazunori Horie

Shinshu University: Tatsuya Saigusa

St Luke's International Hospital: Atsushi Mizuno, Taku Asano

Tajimi City Hospital: Daiki Kato

Tokyo Medical University: Nobuhiro Tanaka, Jun Yamashita

University of Occupational and Environmental Health Japan School of Medicine: Shinjo Sonoda,  
Yoshitaka Muraoka

Wakayama Medical University: Takashi Akasaka, Yasutsugu Shiono

Yamato Seiwa Hospital: Tatsuki Doijiri

**Supplementary Table. Medication During the Follow-up**

| <b>Variables</b>        | <b>Symptomatic</b> | <b>Asymptomatic</b> | <b>P value</b> |
|-------------------------|--------------------|---------------------|----------------|
| <i>1-Year Follow-up</i> |                    |                     |                |
| Antiplatelet therapy    | 475 (83.9)         | 530 (83.7)          | 0.94           |
| Aspirin                 | 425 (75.1)         | 462 (73.0)          | 0.43           |
| Thienopyridine          | 274 (48.4)         | 313 (49.4)          | 0.73           |
| Antianginal drugs       | 441 (77.9)         | 467 (73.8)          | 0.11           |
| Beta-blocker            | 179 (31.6)         | 235 (37.1)          | 0.052          |
| Ca-channel blocker      | 314 (55.5)         | 312 (49.3)          | 0.04           |
| Nitrate                 | 135 (23.9)         | 77 (12.2)           | <0.001         |
| Statin                  | 368 (65.0)         | 439 (69.4)          | 0.12           |
| Oral hypoglycemia agent | 158 (27.9)         | 157 (24.8)          | 0.24           |
| Insulin                 | 32 (5.7)           | 21 (3.3)            | 0.07           |
| <i>2-Year Follow-up</i> |                    |                     |                |
| Antiplatelet therapy    | 462 (82.8)         | 525 (84.3)          | 0.53           |
| Aspirin                 | 405 (72.6)         | 447 (71.7)          | 0.80           |
| Thienopyridine          | 257 (46.1)         | 287 (46.1)          | 1.00           |
| Antianginal drugs       | 434 (77.8)         | 464 (74.5)          | 0.20           |
| Beta-blocker            | 182 (32.6)         | 234 (37.6)          | 0.08           |
| Ca-channel blocker      | 302 (54.1)         | 315 (50.6)          | 0.24           |
| Nitrate                 | 137 (24.6)         | 82 (13.2)           | <0.001         |
| Statin                  | 359 (64.3)         | 433 (69.5)          | 0.06           |
| Oral hypoglycemia agent | 156 (28.0)         | 160 (25.7)          | 0.39           |
| Insulin                 | 33 (5.9)           | 26 (4.2)            | 0.18           |

Categorical variables are expressed as number and percentage.

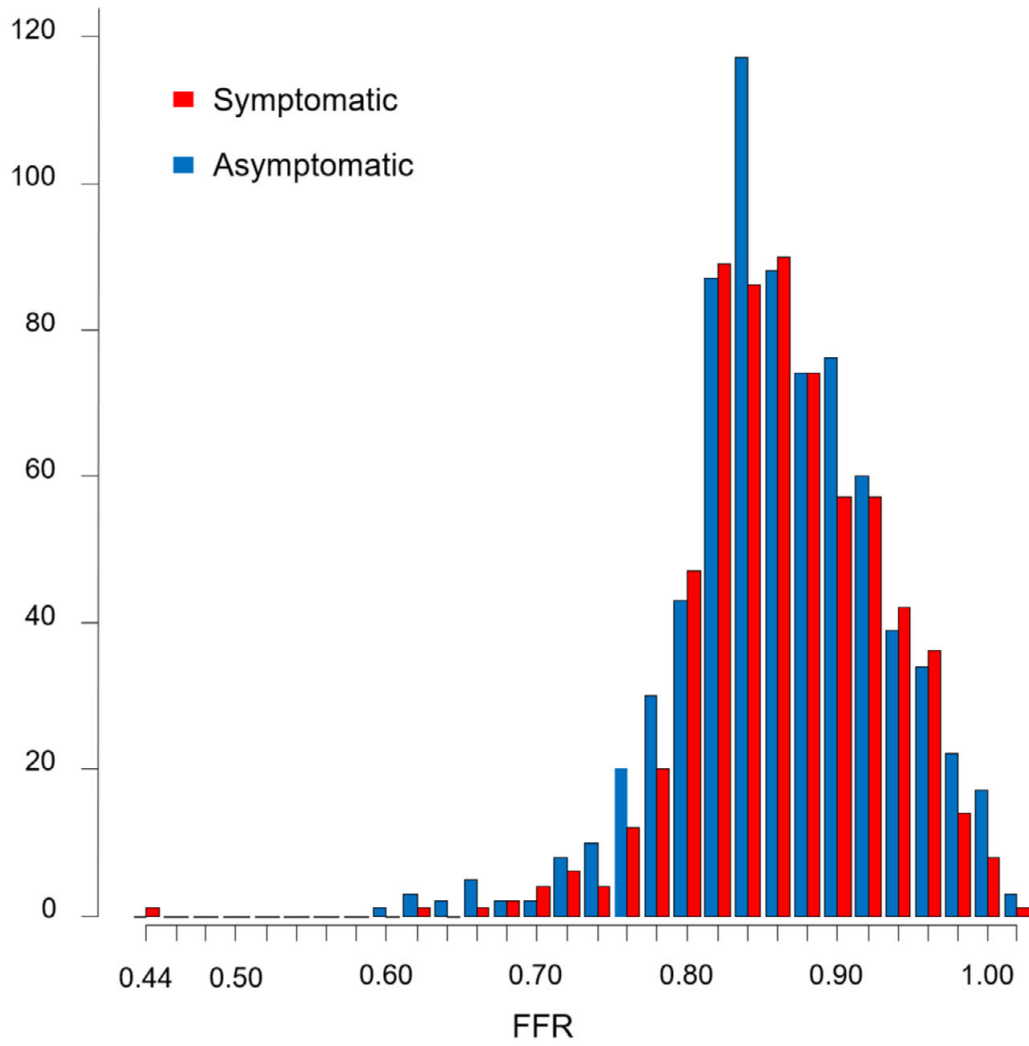

**Supplementary Figure 1. Distribution of FFR**

FFR indicates fractional flow reserve.

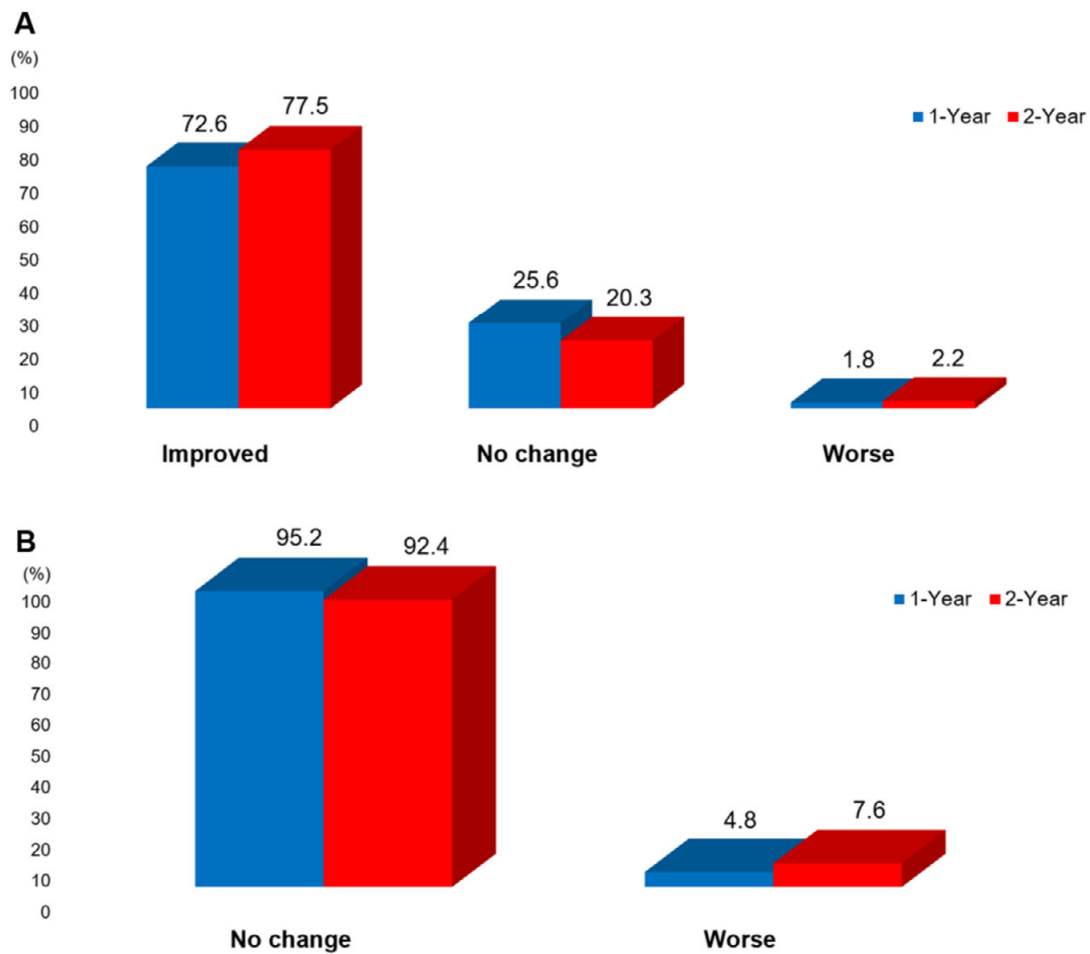

**Supplementary Figure 2. Changes in Clinical Symptom Through 2 Years**

(A) Symptomatic and (B) asymptomatic patients. Improved symptom is defined as an improvement in the Canadian Cardiovascular Society (CCS) classification from the baseline. Worse symptom is defined as a worsening of the CCS classification from the baseline.

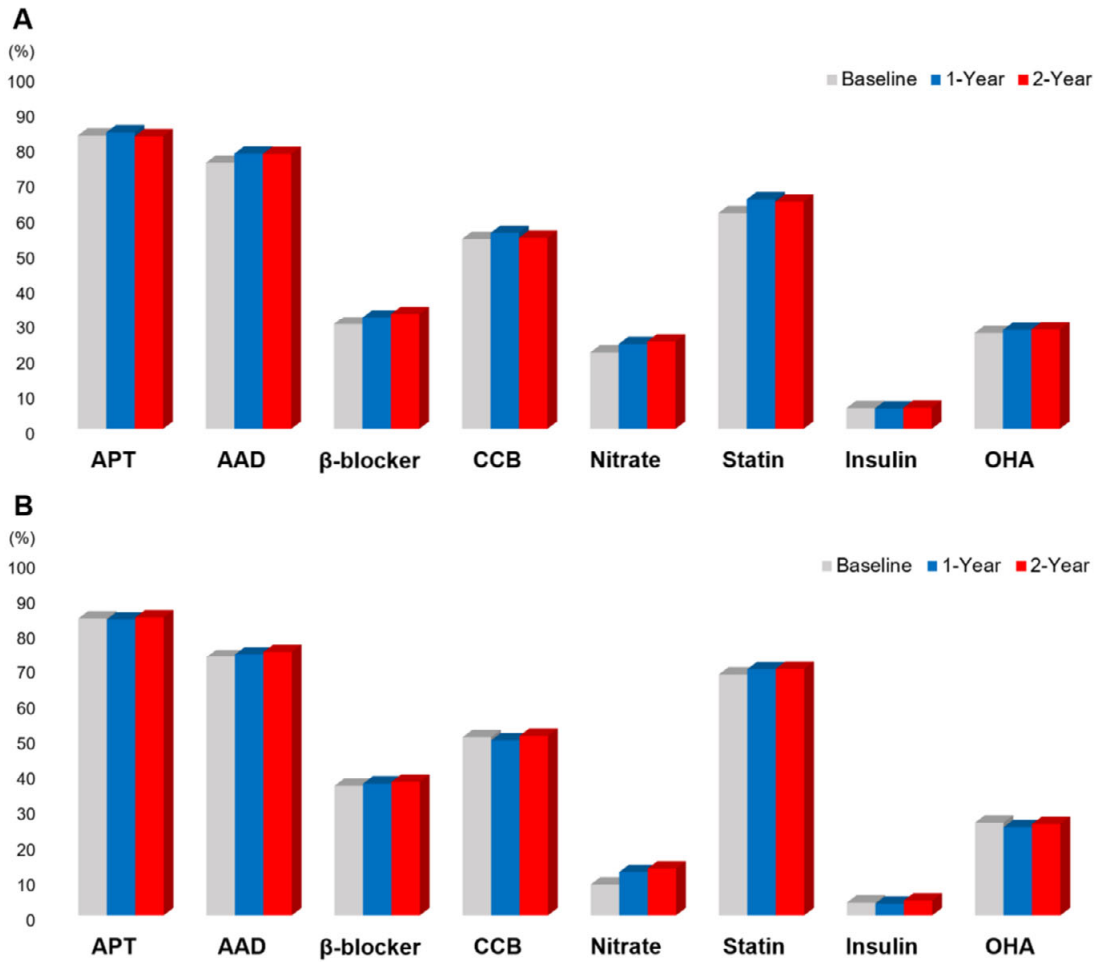

**Supplementary Figure 3. Medication During the Follow-up**

(A) Symptomatic and (B) asymptomatic patients. AAD indicates antianginal drugs (defined as a composite of beta-blocker, calcium-channel blocker [CCB], or nitrate); APT, antiplatelet therapy; and OHA, oral hypoglycemia agent.
